# Supplementary material for: Chimeric MerR-Family Regulators and Logic Elements for the Design of Metal Sensitive Genetic Circuits in Bacillus subtilis
Source: PubMed Central journal article supplement (PMC10028694; doi:10.1021/acssynbio.2c00545), 2023-01-11
Supplement: sb2c00545_si_001.pdf [file sb2c00545_si_001.pdf]

## Supplemental Figures and Tables for:

Chimeric MerR-Family Regulators and Logic Elements for the Design of Metal Sensitive Genetic Circuits in *Bacillus subtilis*

Jasdeep S. Ghataora, Susanne Gebhard\*, Bianca J. Reeksting\*

Life Sciences Department, Milner Centre for Evolution, University of Bath, Claverton Down, Bath BA2 7AY, United Kingdom

\*Corresponding authors:

Bianca Reeksting (bjr39@bath.ac.uk)

Susanne Gebhard (sg844@bath.ac.uk)

|                                                                                                                                                   |    |
|---------------------------------------------------------------------------------------------------------------------------------------------------|----|
| <b>Supplementary Table S1.</b> Bacterial strains used within this study                                                                           | 2  |
| <b>Supplementary Table S2.</b> Plasmids used in this study                                                                                        | 4  |
| <b>Supplementary Table S3.</b> Primers and oligonucleotides used in this study                                                                    | 7  |
| <b>Supplementary Table S4.</b> Relevant DNA sequences for plasmid construction                                                                    | 11 |
| <b>Supplementary Figure S1.</b> Comparison of Gram +ve and Gram -ve MerR promoter activity in <i>B. subtilis</i>                                  | 15 |
| <b>Supplementary Figure S2.</b> Comparison of ZntR sequences and structural analysis of the chimera MerRZntR                                      | 16 |
| <b>Supplementary Figure S3.</b> Activity of double and triple MerRZntR mutants against the wild-type and single mutant MerRZntR <sup>A29E</sup>   | 17 |
| <b>Supplementary Figure S4.</b> Comparison of inter-domain communication between CueR and the chimera MerRCueR                                    | 18 |
| <b>Supplementary Figure S5.</b> Dose response of P <sub>merR</sub> regulated by MerRCueR <sup>mut3</sup> in response to Ag <sup>+</sup> induction | 19 |
| <b>Supplementary Figure S6.</b> Wild-type (P <sub>merR20</sub> ) and mutant (P <sub>merR19</sub> ) promoters                                      | 20 |
| <b>Supplementary Figure S7.</b> The <i>B. subtilis</i> SANDBOX plasmids                                                                           | 21 |
| <b>Supplementary Figure S8.</b> <i>Bacillus subtilis</i> natively regulated CzrA based circuit                                                    | 22 |
| <b>References</b>                                                                                                                                 | 23 |

**Supplementary Table S1. Bacterial strains used in this study**

| Strain  | Characteristics <sup>a</sup>                                                                                                                                                                                            | Construction <sup>b</sup>                                                                        |
|---------|-------------------------------------------------------------------------------------------------------------------------------------------------------------------------------------------------------------------------|--------------------------------------------------------------------------------------------------|
| DH5α    | <i>Escherichia coli</i> DH5α                                                                                                                                                                                            | Laboratory stock                                                                                 |
| W168    | Wild-type <i>Bacillus subtilis</i> W168                                                                                                                                                                                 | Laboratory stock                                                                                 |
| PAO1    | Wild-type <i>Pseudomonas aeruginosa</i> PAO1                                                                                                                                                                            | Laboratory stock                                                                                 |
| SGB1003 | W168 <i>sacA</i> ::pJGlux01-P <sub>merR20</sub> -luxABCDE-cm <sup>f</sup>                                                                                                                                               | pJGlux01 -> W168                                                                                 |
| SGB1005 | W168 <i>sacA</i> ::pJGlux01-P <sub>merR20</sub> -luxABCDE-cm <sup>f</sup> ;<br><i>thrC</i> ::pJGXT01- P <sub>xyIA</sub> -MerR- <i>spc</i> <sup>f</sup>                                                                  | pJGXT01 -> SGB1003                                                                               |
| SGB1006 | W168 <i>sacA</i> ::pJGlux03-P <sub>veg</sub> -luxABCDE-cm <sup>f</sup>                                                                                                                                                  | pJGlux03 -> W168                                                                                 |
| SGB1007 | W168 <i>sacA</i> ::pAH328                                                                                                                                                                                               | pAH328 -> W168                                                                                   |
| SGB1011 | W168 <i>sacA</i> ::pJGlux01-P <sub>merR20</sub> -luxABCDE-cm <sup>f</sup> ;<br><i>thrC</i> ::pJGXT02- P <sub>xyIA</sub> -MerRZntR- <i>spc</i> <sup>f</sup>                                                              | pJGXT02 -> SGB1003                                                                               |
| SGB1014 | W168 <i>sacA</i> ::pJGlux02- P <sub>merR19</sub> -luxABCDE-cm <sup>f</sup>                                                                                                                                              | pJGlux02 -> W168                                                                                 |
| SGB1015 | W168 <i>sacA</i> ::pJGlux02- P <sub>merR19</sub> -luxABCDE-cm <sup>f</sup> ;<br><i>thrC</i> ::pJGXT01- P <sub>xyIA</sub> -MerR- <i>spc</i> <sup>f</sup>                                                                 | pJGXT02 ->SGB1014                                                                                |
| SGB1027 | W168 <i>sacA</i> ::pJGlux01-P <sub>merR20</sub> -luxABCDE-cm <sup>f</sup> -<br>cm <sup>f</sup> ; <i>thrC</i> ::pJGXT03- P <sub>xyIA</sub> -MerRCueR - <i>spc</i> <sup>f</sup>                                           | pJGXT03 -> SGB1003                                                                               |
| SGB1028 | W168 <i>sacA</i> ::pJGlux01-P <sub>merR</sub> -luxABCDE-cm <sup>f</sup> ;<br><i>thrC</i> ::pJGXT07- P <sub>xyIA</sub> -MerRCueR <sup>A29T</sup> - <i>spc</i> <sup>f</sup>                                               | pJGXT07 -> SGB1003                                                                               |
| SGB1029 | W168 <i>sacA</i> ::pJGlux01-P <sub>merR20</sub> -luxABCDE-cm <sup>f</sup> ;<br><i>thrC</i> ::pJGXT08- P <sub>xyIA</sub> -MerRCueR <sup>A29T/G30P</sup> - <i>spc</i> <sup>f</sup>                                        | pJGXT08 -> SGB1003                                                                               |
| SGB1030 | W168 <i>sacA</i> ::pJGlux01-P <sub>merR20</sub> -luxABCDE-cm <sup>f</sup> ;<br><i>thrC</i> ::pJGXT11-P <sub>xyIA</sub> -MerRCueR <sup>A29T/G30P/P32M</sup> -<br><i>spc</i> <sup>f</sup>                                 | pJGXT11 -> SGB1003                                                                               |
| SGB1034 | W168 <i>sacA</i> ::pJGlux04-P <sub>cadA</sub> -luxABCDE-cm <sup>f</sup>                                                                                                                                                 | pJGlux04 -> W168                                                                                 |
| SGB1035 | W168 <i>sacA</i> ::pJGlux01-P <sub>merR20</sub> -luxABCDE-cm <sup>f</sup> ;<br><i>thrC</i> ::pJGXT15-P <sub>xyIA</sub> -MerRZntR <sup>A29E</sup> - <i>spc</i> <sup>f</sup>                                              | pJGXT15 -> SGB1003                                                                               |
| SGB1036 | W168 <i>sacA</i> ::pJGlux01-P <sub>merR20</sub> -luxABCDE-cm <sup>f</sup> ;<br><i>thrC</i> ::pJGXT16- P <sub>xyIA</sub> -MerRZntR <sup>A29E/G30H</sup> - <i>spc</i> <sup>f</sup>                                        | pJGXT16 -> SGB1003                                                                               |
| SGB1047 | W168 <i>sacA</i> ::pJGlux01-P <sub>merR20</sub> -luxABCDE-cm <sup>f</sup> ;<br><i>thrC</i> ::pJGXT23-P <sub>xyIA</sub> -MerRZntR <sup>A29E/G30H/P32V</sup> - <i>spc</i> <sup>f</sup>                                    | pJGXT23 -> SGB1003                                                                               |
| SGB1050 | W168 <i>sacA</i> ::pJGlux02-P <sub>merR19</sub> -luxABCDE-cm <sup>f</sup> ;<br><i>thrC</i> ::pJGXT11-P <sub>xyIA</sub> -MerRCueR <sup>A29T/G30P/P32M</sup> -<br><i>spc</i> <sup>f</sup>                                 | pJGXT11 -> SGB1014                                                                               |
| SGB1060 | W168 Δ <i>oxdC-yvrJ-rsiO/sigO-rsoA</i>                                                                                                                                                                                  | pBSANDdel -> W168                                                                                |
| SGB1061 | W168 Δ <i>oxdC-yvrJ-rsiO/sigO-rsoA</i> ;<br><i>sacA</i> ::pBSANDlux-cm <sup>f</sup>                                                                                                                                     | pBSANDlux -> SGB1060                                                                             |
| SGB1064 | W168 Δ <i>oxdC-yvrJ-rsiO/sigO-rsoA</i> ;<br><i>sacA</i> ::pBSANDlux-cm <sup>f</sup> ; <i>lacA</i> ::pBSAND2-P <sub>xyIA</sub> -<br>MLS <sup>f</sup>                                                                     | pBSAND2-P <sub>xyIA</sub> -> SGB1061                                                             |
| SGB1065 | W168 Δ <i>oxdC-yvrJ-rsiO/sigO-rsoA</i> ;<br><i>sacA</i> ::pBSANDlux-cm <sup>f</sup> ; <i>lacA</i> ::pBSAND2-P <sub>xyIA</sub> -<br>MLS <sup>f</sup> ; <i>thrC</i> ::pBSAND1-P <sub>liaI</sub> - <i>spc</i> <sup>f</sup> | pBSAND1-P <sub>liaI</sub> -> SGB1064                                                             |
| SGB1067 | W168 <i>sacA</i> ::pBSGGlux-P <sub>cadA</sub> -cm <sup>f</sup>                                                                                                                                                          | pBSGGlux-P <sub>cadA</sub> -> W168                                                               |
| SGB1068 | W168 Δ <i>oxdC-yvrJ-rsiO/sigO-rsoA</i> ;<br><i>sacA</i> ::pBSANDlux -cm <sup>f</sup> ; <i>lacA</i> ::pBSAND2-P <sub>cadA</sub> -<br>MLS <sup>f</sup>                                                                    | pBSAND2-P <sub>cadA</sub> -> SGB1061                                                             |
| SGB1072 | W168 Δ <i>oxdC-yvrJ-rsiO/sigO-rsoA</i> ;<br><i>sacA</i> ::pBSANDlux -cm <sup>f</sup> ; <i>lacA</i> ::pBSAND2-P <sub>cadA</sub> -<br>Terminator-P <sub>merR</sub> -> SGB1068                                             | pBSAND1-P <sub>xyIA</sub> -MerRZntR <sup>A29E</sup> -<br>Terminator-P <sub>merR</sub> -> SGB1068 |

|  |                                                                                                                               |  |
|--|-------------------------------------------------------------------------------------------------------------------------------|--|
|  | <i>MLS<sup>r</sup>; thrC::pBSAND1-P<sub>xyIA</sub>-MerRZntR<sup>A29E</sup>- Terminator-P<sub>merR20</sub>-spc<sup>r</sup></i> |  |
|--|-------------------------------------------------------------------------------------------------------------------------------|--|

<sup>a</sup> Relevant characteristics are listed. Antibiotic resistance cassettes are denoted as follows: *cm*: chloramphenicol resistance; *spc*: spectinomycin resistance; *MLS*: erythromycin and lincomycin resistance.

<sup>b</sup> The direction of strain construction is indicated by an arrow which involves transformation with plasmids as indicated. Plasmids referred to are given in Table S2.

**Supplementary Table S2. Plasmids used in this study**

| Plasmid                  | Characteristics <sup>a</sup>                                                                                                                             | Source                                    |
|--------------------------|----------------------------------------------------------------------------------------------------------------------------------------------------------|-------------------------------------------|
| pXT                      | Plasmid for xylose-inducible gene expression; integrates in <i>thrC</i> ; <i>spc<sup>r</sup></i> , <i>amp<sup>r</sup></i> , ori ColE1                    | 1                                         |
| pAH328                   | Plasmid for transcriptional promoter fusions to <i>luxABCDE</i> (luciferase); integrates at <i>sacA</i> ; <i>cm<sup>r</sup></i> , <i>amp<sup>r</sup></i> | 2                                         |
| pBS4S                    | Empty plasmid, integration at <i>thrC</i> , <i>amp<sup>r</sup></i> , <i>spec<sup>r</sup></i> , ori ColE1                                                 | 3                                         |
| pBS2E                    | Empty plasmid, integration at <i>lacA</i> , <i>amp<sup>r</sup></i> , <i>mls<sup>r</sup></i> , ori ColE1                                                  | 3                                         |
| pBS3Clux                 | Bacterial luciferase ( <i>luxABCDE</i> ) plasmid, integration at <i>sacA</i> , <i>amp<sup>r</sup></i> , <i>cm<sup>r</sup></i> , ori ColE1                | 3                                         |
| pSB1A3-P <sub>xyIA</sub> | <i>amp<sup>r</sup></i> , ori pMB1, P <sub>xyIA</sub> (xylose inducible promoter)                                                                         | 3                                         |
| pSB1C3-P <sub>veg</sub>  | <i>cm<sup>r</sup></i> , ori pMB1, P <sub>veg</sub> (strong constitutive <i>B. subtilis</i> promoter)                                                     | 3                                         |
| pJOE8999                 | CRISPR-Cas9 deletion plasmid, <i>kan<sup>r</sup></i> ; pUC-ori, temperature sensitive ori for <i>B. subtilis</i> (permissive at 30°C)                    | 4                                         |
| pJGlux01                 | P <sub>merR20</sub> – <i>luxABCDE</i> transcriptional fusion, derived from pAH328                                                                        | This study                                |
| pJGlux02                 | P <sub>merR19</sub> – <i>luxABCDE</i> transcriptional fusion, derived from pAH328                                                                        | This study                                |
| pJGlux03                 | P <sub>veg</sub> - <i>luxABCDE</i> transcription fusion, derived from pAH328                                                                             | This study                                |
| pJGlux04                 | P <sub>cadA19</sub> - <i>luxABCDE</i> transcriptional fusion, derived from pAH328                                                                        | This study                                |
| pJGXT01                  | P <sub>xyIA</sub> -MerR transcriptional fusion, derived from pXT                                                                                         | This study                                |
| pJGUC01                  | pUC19 derived vector, <i>amp<sup>r</sup></i> , ori ColE1, source of MerRZntR chimera RBS and CDS                                                         | This study (GenScript synthesised vector) |
| pJGXT02                  | P <sub>xyIA</sub> -MerRZntR transcriptional fusion, derived from pXT                                                                                     | This study                                |
| pJGUC02                  | pUC19 derived vector, <i>amp<sup>r</sup></i> , ori ColE1, source of MerRCueR chimera RBS and CDS                                                         | This study (GenScript synthesised vector) |
| pJGXT03                  | P <sub>xyIA</sub> -MerRCueR transcriptional fusion, derived from pXT                                                                                     | This study                                |

|              |                                                                                                                                                                                                       |            |
|--------------|-------------------------------------------------------------------------------------------------------------------------------------------------------------------------------------------------------|------------|
| pJGXT07      | P <sub>xyIA</sub> -MerRCueR <sup>A29T</sup><br>transcriptional fusion, derived<br>from pJGXT03                                                                                                        | This study |
| pJGXT08      | P <sub>xyIA</sub> -MerRCueR <sup>A29T/G30P</sup><br>transcriptional fusion, derived<br>from pJGXT03                                                                                                   | This study |
| pJGXT11      | P <sub>xyIA</sub> -MerRCueR <sup>A29T/G30P/P32M</sup><br>transcriptional fusion, derived<br>from pJGXT03                                                                                              | This study |
| pJGXT15      | P <sub>xyIA</sub> -MerRZntR <sup>A29E</sup><br>transcriptional fusion, derived<br>from pJGXT02                                                                                                        | This study |
| pJGXT16      | P <sub>xyIA</sub> -MerRZntR <sup>A29E/G30H</sup><br>transcriptional fusion, derived<br>from pJGXT02                                                                                                   | This study |
| pJGXT23      | P <sub>xyIA</sub> -MerRZntR <sup>A29E/G30H/P32V</sup><br>transcriptional fusion, derived<br>from pJGXT02                                                                                              | This study |
| pJGBS3Clux02 | Bacterial luciferase ( <i>luxABCDE</i> )<br>plasmid with BsaI deletion in<br><i>amp<sup>r</sup></i> , pBS3Clux derived                                                                                | This study |
| pJGBS3Clux03 | Bacterial luciferase ( <i>luxABCDE</i> )<br>plasmid with BsaI deletion in<br><i>amp<sup>r</sup></i> and <i>luxC</i> , derived from<br>pJGBS3Clux02                                                    | This study |
| pBSGGlux     | Bacterial luciferase ( <i>luxABCDE</i> )<br>plasmid, integration at <i>sacA</i> ,<br><i>amp<sup>r</sup></i> , <i>cm<sup>r</sup></i> , ori ColE1 – Golden<br>Gate vector, derived from<br>pJGBS3Clux03 | This study |
| pJGBS2E03    | Empty plasmid with BsaI<br>deletion in <i>amp<sup>r</sup></i> , derived from<br>pBS2E                                                                                                                 | This study |
| pJGBS2E04    | Empty plasmid with BsaI<br>deletion in <i>amp<sup>r</sup></i> , and NgoMIV<br>insertion in <i>amp<sup>r</sup></i> derived from<br>pBS2E                                                               | This study |
| pBSAND2      | Empty plasmid with Golden<br>Gate cloning site allowing for<br>SigO expression, derived from<br>pJGBS2E04                                                                                             | This study |
| pJGBS4S01    | Empty plasmid with BsaI<br>deletion in <i>amp<sup>r</sup></i>                                                                                                                                         | This study |
| pBSAND1      | Empty plasmid with Golden<br>Gate cloning site allowing for<br>RsoA expression, derived from<br>pJGBS4S01                                                                                             | This study |
| pBSANDdel    | CRISPR-Cas9 deletion vector<br>allowing for guided cut<br>upstream of <i>rsiO</i> in <i>B. subtilis</i><br>with repair homology flanking                                                              | This study |

|                                                                                                    |                                                                                                                                                                                                       |            |
|----------------------------------------------------------------------------------------------------|-------------------------------------------------------------------------------------------------------------------------------------------------------------------------------------------------------|------------|
|                                                                                                    | region to allow for <i>oxdC-yvrJ-rsiO/sigO-rsoA</i> deletion (SigO-RsoA regulon)                                                                                                                      |            |
| pBSANDlux                                                                                          | P <sub><i>oxdC</i></sub> – luciferase reporter regulated by both SigO and RsoA, derived from pBSGGLux                                                                                                 | This study |
| pBSAND2-P <sub><i>xyIA</i></sub>                                                                   | Xylose-inducible expression of SigO, derived from pBSAND2                                                                                                                                             | This study |
| pBSAND1-P <sub><i>lial</i></sub>                                                                   | Bacitracin-inducible expression of RsoA, derived from pBSAND1                                                                                                                                         | This study |
| pBSGGLux-P <sub><i>cadA</i></sub>                                                                  | Metal-inducible expression of luciferase – natively regulated by CzrA in <i>B. subtilis</i>                                                                                                           | This study |
| pBSAND2-P <sub><i>cadA</i></sub>                                                                   | Metal-inducible expression of SigO, derived from pBSAND2                                                                                                                                              | This study |
| pBSAND1-P <sub><i>xyIA</i></sub> -MerRZntR <sup>A29E</sup> - Terminator-P <sub><i>merR20</i></sub> | Xylose-inducible expression of MerRZntR <sup>A29E</sup> to subsequently regulate RsoA expression driven by P <sub><i>merR20</i></sub> (regulated by MerRZntR <sup>A29E</sup> ) – derived from pBSAND1 | This study |

<sup>a</sup> Relevant characteristics are listed. Antibiotic resistance cassettes as follows: *amp<sup>r</sup>* ; ampicillin resistance; *kan<sup>r</sup>* : kanamycin resistance; *cm<sup>r</sup>* : chloramphenicol resistance; *spc<sup>r</sup>* : spectinomycin resistance; *mls*: erythromycin and lincomycin resistance.

Supplementary Table S3. Primers and oligonucleotides used in this study

| Primer | Description                           | Sequence <sup>a</sup>                           | Function                                                              |
|--------|---------------------------------------|-------------------------------------------------|-----------------------------------------------------------------------|
| SG0245 | pBS2E/pBSAND2 check fwd               | GGCAACCGAGCGTTCTG                               | Verification of inserts into pBS2E derived plasmids                   |
| SG0246 | pBS2E/pBSAND2 check rev               | CTGACAGCGTTTCGATCC                              | Verification of inserts into pBS2E derived plasmids                   |
| SG0528 | <i>sacA</i> insertion up fwd          | CTGATTGGCATGGCGATTGC                            | Verification of <i>sacA</i> integration for pBS3Clux derived plasmids |
| SG0529 | <i>sacA</i> insertion up rev          | ACAGCTCCAGATCCTCTACG                            | Verification of <i>sacA</i> integration for pBS3Clux derived plasmids |
| SG0530 | <i>sacA</i> insertion down fwd        | GTCGCTACCATTACCAGTTG                            | Verification of <i>sacA</i> integration for pBS3Clux derived plasmids |
| SG0531 | <i>sacA</i> insertion down fwd        | TCCAAACATTCCGGTGTATC                            | Verification of <i>sacA</i> integration for pBS3Clux derived plasmids |
| SG0148 | pBS2E/pBSAND2 up fwd                  | GCATACCGGTTGCCGTCATC                            | Verification of lacA integration for pBS2E derived plasmids           |
| SG1305 | pBS2E/pBSAND2 up rev                  | ATCTATTATTTAACGGGAGGAAATAATTC                   | Verification of lacA integration for pBS2E derived plasmids           |
| SG1346 | pBS2E/pBSAND2 down fwd                | CTGCAGAGATATCGATTTCAAGC                         | Verification of lacA integration for pBS2E derived plasmids           |
| SG0149 | pBS2E/pBSAND2 down fwd                | GAACTACATGCACTCCACAC                            | Verification of lacA integration for pBS2E derived plasmids           |
| SG601  | pBS4S/pBSAND1 check fwd               | CAGTCAACCCTTACCGCATTG                           | Verification of inserts into pBS4S derived plasmids                   |
| SG602  | pBS4S/pBSAND1 check fwd               | CCTCCTCACTATTTTGATTAGTACC                       | Verification of inserts into pBS4S derived plasmids                   |
| SG0985 | EcoRI + P <sub>merR</sub> fwd         | ttaa <b>GAATTC</b> AACGGAAGAATGTGGCTC TTGG      | Amplification of P <sub>merR20</sub>                                  |
| SG0986 | SpeI + P <sub>merR</sub> rev          | ttaa <b>ACTAGT</b> TGATTTTCATCCCATATTGT CACC    | Amplification of P <sub>merR20</sub>                                  |
| SG0987 | BamHI + Native RBS + MerR fwd         | ttaa <b>GGATCC</b> gaggtGACAATATGGGGATG AAAATC  | Amplification of MerR with native RBS                                 |
| SG0988 | EcoRI + MerR rev                      | ttaa <b>GAATTC</b> TATTTATCAGGCCCTCCCAT TAACGTT | Amplification of MerR with native RBS                                 |
| SG0991 | pAH328/pBS3Clux check fwd             | GAGCGTAGCGAAAAATCC                              | Verification of inserts into pAH328/pBS3Clux derived plasmids         |
| SG0992 | pAH328/pBS3Clux check rev             | GAAATGATGCTCCAGTAACC                            | Verification of inserts into pAH328/pBS3Clux derived plasmids         |
| SG1124 | P <sub>merR20</sub> 1-bp deletion fwd | GGTACAGGGTTATACTTTTTATTGAGGTG ACAATATGGGG       | Mutagenesis of P <sub>merR20</sub> make P <sub>merR19</sub>           |
| SG1125 | P <sub>merR20</sub> 1-bp deletion fwd | AAAAAGTATAACCCTGTACCATAGTACAC GGTC AAGTCAT      | Mutagenesis of P <sub>merR20</sub> make P <sub>merR19</sub>           |

|        |                                                   |                                                                                       |                                                                                       |
|--------|---------------------------------------------------|---------------------------------------------------------------------------------------|---------------------------------------------------------------------------------------|
| SG1142 | MerRCueR <sup>A29T</sup> fwd                      | AGGATTGATAACAGGGCCTCCCAGAAACG<br>AATCAGGGTATCGC                                       | MerRCueR -> MerCueR <sup>A29T</sup><br>mutagenesis                                    |
| SG1143 | MerRCueR <sup>A29T</sup> rev                      | TGGGAGGCCCTGTTATCAATCCTTTCCGCT<br>CGTAATACCGAAC                                       | MerRCueR -> MerCueR <sup>A29T</sup><br>mutagenesis                                    |
| SG1154 | MerRCueR <sup>A29T/G30P</sup> fwd                 | ATTGATAACACCGCCTCCCAGAAACGAAT<br>CAGGGTATCGCACC                                       | MerRCueR -><br>MerRCueR <sup>A29T/G30P</sup><br>mutagenesis                           |
| SG1155 | MerRCueR <sup>A29T/G30P</sup> rev                 | TTCTGGGAGGCGGTGTTATCAATCCTTTCC<br>GCTCGTAATACCG                                       | MerRCueR -><br>MerRCueR <sup>A29T/G30P</sup><br>mutagenesis                           |
| SG1164 | P <sub>cadA19</sub> fwd                           | TTTAA <b>GAATT</b> CTTCGCGCTCGTAGTAGCG<br>GATGGTC                                     | Amplification of the P <sub>cadA19</sub><br>promoter from <i>P. aeruginosa</i>        |
| SG1171 | P <sub>cadA19</sub> fwd                           | TTTAA <b>ACTAGT</b> TGTTGGGTGCGATTGCAC<br>ACCTGT                                      | Amplification of the P <sub>cadA19</sub><br>promoter from <i>P. aeruginosa</i>        |
| SG1167 | MerRCueR <sup>A29T/G30P/P32M</sup><br>fwd         | AACACCGCCTATGAGAAACGAATCAGGGT<br>ATCGCACCTACACG                                       | MerRCueR <sup>A29T/G30P</sup> -><br>MerRCueR <sup>A29T/G30P/P32M</sup><br>mutagenesis |
| SG1168 | MerRCueR <sup>A29T/G30P/P32M</sup><br>rev         | ATTCGTTTCTCATAGGCGGTGTTATCAATC<br>CTTTCCGCTCGTA                                       | MerRCueR <sup>A29T/G30P</sup> -><br>MerRCueR <sup>A29T/G30P/P32M</sup><br>mutagenesis |
| SG1172 | MerRZntR <sup>A29E</sup> fwd                      | AGGATTGATAGAAGGGCCTCCCAGAAAC<br>GAATCAGGGTATCGA                                       | MerRZntR -> MerRZntR <sup>A29E</sup><br>mutagenesis                                   |
| SG1173 | MerRZntR <sup>A29E</sup> rev                      | TGGGAGGCCCTTCTATCAATCCTTTCCGCT<br>CGTAATACCGAAC                                       | MerRZntR -> MerRZntR <sup>A29E</sup><br>mutagenesis                                   |
| SG1174 | MerRZntR <sup>A29E/G30H</sup> fwd                 | GAAAGGATTGATAGA <b>ACAT</b> CCTCCCAGAA<br>ACGAATCAGGGTATCGACTA                        | MerRZntR -> MerRZntR <sup>A29E/G30H</sup><br>mutagenesis                              |
| SG1175 | MerRZntR <sup>A29E/G30H</sup> rev                 | CGTTTCTGGGAGG <b>ATGTT</b> CTATCAATCCTT<br>TCGCTCGTAATACCGAAC                         | MerRZntR -> MerRZntR <sup>A29E/G30H</sup><br>mutagenesis                              |
| SG1200 | MerRZntR <sup>A29E/G30H/P32V</sup><br>fwd         | CGAGCGGAAAGGATTGATAGA <b>ACAT</b> CCTG<br>TTAGAAACGAATCAGGGTATCGACTATAT<br>ACC        | MerRZntR -><br>MerRZntR <sup>A29E/G30H/P32V</sup><br>mutagenesis                      |
| SG1201 | MerRZntR <sup>A29E/G30H/P32V</sup><br>rev         | CGATACCCTGATTCGTTTCT <b>ACAGGATGT</b><br><b>ICT</b> ATCAATCCTTTCCGCTCGTAATACC         | MerRZntR -><br>MerRZntR <sup>A29E/G30H/P32V</sup><br>mutagenesis                      |
| SG1239 | Bsal deletion in <i>luxC</i><br>fwd               | GACGGAATGAGGCCGTTGCAACGATTAGT<br>GACATATATT                                           | Bsal deletion in <i>luxC</i> of<br>pBS3Clux                                           |
| SG1240 | Bsal deletion in <i>luxC</i> rev                  | GTTGCAACGGCCTCATTCCGTCATGAGATC<br>CACCAACTC                                           | Bsal deletion in <i>luxC</i> of<br>pBS3Clux                                           |
| SG1242 | Bsal deletion in <i>amp<sup>r</sup></i><br>fwd    | TGAGCGTGGCTCTCGCGGTATCATTGCAG<br>CACTGG                                               | Bsal deletion in <i>amp<sup>r</sup></i>                                               |
| SG1243 | Bsal deletion in <i>amp<sup>r</sup></i><br>rev    | ACCGCGAGAGCCACGCTCACCGGCTCCAG<br>ATTTATCAG                                            | Bsal deletion in <i>amp<sup>r</sup></i>                                               |
| SG1245 | NgoMIV insertion in<br><i>amp<sup>r</sup></i> fwd | TTGACGCCGGCCAAGAGCAACTCGGTCGC<br>CGCATAAC                                             | Insertion of NgoMIV site in<br><i>amp<sup>r</sup></i>                                 |
| SG1246 | NgoMIV insertion in<br><i>amp<sup>r</sup></i> rev | GTTGCTCTTGCCGGCGTCAACACGGGAT<br>AATACC                                                | Insertion of NgoMIV site in<br><i>amp<sup>r</sup></i>                                 |
| SG1274 | Sfil + RBS + SigO fwd                             | TTAAAG <b>GCC</b> ACCCAG <b>GCC</b> gctcttaaggagga<br>ttttagaATGAAGCATCCCATCGTGAAGCAT | Amplification of SigO to<br>include RBS R1                                            |



|        |                                                                |                                                                                                                 |                                                                                                                                   |
|--------|----------------------------------------------------------------|-----------------------------------------------------------------------------------------------------------------|-----------------------------------------------------------------------------------------------------------------------------------|
| SG1248 | PstI + SigO + 3' - Terminator rev                              | AAACTG <b>CAG</b> AAAAAACGCGAGCGTCAGG<br>CGCTCGCGTTTTCTAATCGATTACTTTTCC<br>CCCTTTTTTGGCGC                       | Amplification of SigO to include 3'-Terminator                                                                                    |
| SG1275 | SfiI + RBS + RsoA fwd                                          | TTAAAG <b>GCC</b> ACCCAG <b>GCC</b> gctctaaggagga<br>ttttagaGTGGACGGCCAGTTGAACAAAA                              | Amplification of RsoA to include RBS R1                                                                                           |
| SG1250 | PstI + RsoA + 3' - Terminator rev                              | TTAAACTG <b>CAG</b> AAAAAACGCGAGCGTCAG<br>GCGCTCGCGTTTTCTAATCGATTATGAGT<br>TCTCATCTACCATGTAC                    | Amplification of RsoA to include 3' - Terminator                                                                                  |
| SG1272 | EcoRI + RFP + 5' - Terminator + 5' - Bsal fwd                  | TTAAAG <b>AATTC</b> AAAAACGCGAGCGCCTGA<br>CGCTCGCGTTTTTCCCTACTCG <b>GAGACCTC</b><br>ATTCTCGCAATACGCAAACCGCCTCTC | Amplification of RFP to include 5'-Terminator and 5' Bsal site (new Bsal Golden Gate site) – For plasmids pBSAND1/2 and pBSANDlux |
| SG1273 | SfiI + RFP + 5' - Bsal site rev                                | TTAAAG <b>GCC</b> TGGGT <b>GCC</b> CTACTGATAATT<br>CT <b>GAGACC</b> ATAAACGCAGAAAGGCCACC<br>C                   | Amplification of RFP to include 3'-Bsal site (new Bsal Golden Gate site) – For plasmids pBSAND1/2                                 |
| SG1324 | PstI + RFP + 3' - Bsal site rev                                | TTAAACTG <b>CAG</b> GGTACTGATAATTCT <b>GAG</b><br><b>ACC</b> ATAAACGCAGAAAGGCCACC                               | Amplification of RFP to include 3'-Bsal site (new Golden Gate site) – for plasmid pBSANDlux                                       |
| SG1297 | Bsal + P <sub>xyIA</sub> fwd                                   | TTTAAAG <b>GTCTC</b> ATACTAAGGCCAAAAAA<br>CTGCTGCCTTCG                                                          | Amplification of P <sub>xyIA</sub>                                                                                                |
| SG1298 | Bsal + P <sub>xyIA</sub> rev                                   | TTTAAAG <b>GTCTC</b> TATTCTTCGATAAGCTTG<br>GGATCCCAG                                                            | Amplification of P <sub>xyIA</sub>                                                                                                |
| SG1299 | Bsal + P <sub>oxdC</sub> fwd                                   | TTTAAAG <b>GTCTC</b> ATACTGATTTCGAAAAGA<br>AGTTTGATCA                                                           | Amplification of P <sub>oxdC</sub>                                                                                                |
| SG1300 | Bsal + P <sub>oxdC</sub> rev                                   | TTTAAAG <b>GTCTC</b> TATTCTTCGTTTTCCCTTC<br>TGTTTTGT                                                            | Amplification of P <sub>oxdC</sub>                                                                                                |
| SG1303 | pBSGGlux new GoldenGate site check fwd                         | AAAAACGCGAGCGCCTGAC                                                                                             | Check for insertion of RFP with new Golden Gate site in pBSGGlux                                                                  |
| SG1325 | pBSGGlux new GoldenGate site check rev                         | GCAGGGTACTGATAATTCTGAGACCAT                                                                                     | Check for insertion of RFP with new Golden Gate site in pBSGGlux                                                                  |
| SG1326 | <i>oxdC-yvrJ-rsiO/sigO-rsoA</i> left hand homology + SfiI fwd  | Ttaaa <b>GGCCA</b> ACGAG <b>GCCT</b> CAATGAAGCTG<br>TCAGAGATGAAC                                                | Amplification of <i>oxdC-yvrJ-rsiO/sigO-rsoA</i> left hand homology region for pBSANDdel deletion vector                          |
| SG1327 | <i>oxdC-yvrJ-rsiO/sigO-rsoA</i> left hand homology + SfiI rev  | TTAAAG <b>GCC</b> TAAAT <b>GGCCA</b> AAGAACGCATT<br>CCAATTGGATGC                                                | Amplification of <i>oxdC-yvrJ-rsiO/sigO-rsoA</i> left hand homology region for pBSANDdel deletion vector                          |
| SG1328 | <i>oxdC-yvrJ-rsiO/sigO-rsoA</i> right hand homology + SfiI fwd | TTAAAG <b>GCC</b> ATTTAG <b>GCCT</b> TTTCATATGAAA<br>AAACATCAAAGGGAG                                            | Amplification of <i>oxdC-yvrJ-rsiO/sigO-rsoA</i> right hand homology region for pBSANDdel deletion vector                         |

|        |                                                                 |                                                                                                   |                                                                                                           |
|--------|-----------------------------------------------------------------|---------------------------------------------------------------------------------------------------|-----------------------------------------------------------------------------------------------------------|
| SG1329 | <i>oxdC-yvrJ-rsiO/sigO-rsoA</i> right hand homology + Sfil rev  | TTAAAG <b>GCCTTATTGGCCG</b> CTACGATCA<br>ACTCGGCATT                                               | Amplification of <i>oxdC-yvrJ-rsiO/sigO-rsoA</i> right hand homology region for pBSANDdel deletion vector |
| SG1344 | $\Delta$ <i>oxdC-yvrJ-rsiO/sigO-rsoA</i> deletion check fwd     | GAACATATTCGAATCTCCTTTCAA                                                                          | Check for $\Delta$ <i>oxdC-yvrJ-rsiO/sigO-rsoA</i> deletion using pBSANDdel                               |
| SG1345 | $\Delta$ <i>oxdC-yvrJ-rsiO/sigO-rsoA</i> deletion check rev     | TGCCTTCAGGATTTGGGATAAA                                                                            | Check for $\Delta$ <i>oxdC-yvrJ-rsiO/sigO-rsoA</i> deletion using pBSANDdel                               |
| SG1347 | pBSANDdel homology insertion check fwd                          | GATTTGTTTCAGAACGCTCGGT                                                                            | Check for insertion of <i>oxdC-yvrJ-rsiO/sigO-rsoA</i> flanking homology regions into pBSANDdel           |
| SG1348 | pBSANDdel homology insertion check rev                          | ACGCATTGATTTGAGTCAGCT                                                                             | Check for insertion of <i>oxdC-yvrJ-rsiO/sigO-rsoA</i> flanking homology regions into pBSANDdel           |
| SG1349 | sgRNA for $\Delta$ <i>oxdC-yvrJ-rsiO/sigO-rsoA</i> deletion fwd | TACGGTTCTCTGCAAGCCTTCATA                                                                          | sgRNA to guide Cas9 in pBSANDdel for $\Delta$ <i>oxdC-yvrJ-rsiO/sigO-rsoA</i> deletion                    |
| SG1350 | sgRNA for $\Delta$ <i>oxdC-yvrJ-rsiO/sigO-rsoA</i> deletion fwd | AAACTATGAAGGCTTGCAGAGAAC                                                                          | sgRNA to guide Cas9 in pBSANDdel for $\Delta$ <i>oxdC-yvrJ-rsiO/sigO-rsoA</i> deletion                    |
| SG1382 | MerRZntR <sup>A29E</sup> + Bsal fwd                             | TTTAAAG <b>GTCTCGTTTT</b> <u>gaggt</u> GACAATATG<br>GGGATGAAAA                                    | Amplification of MerRZntR <sup>A29E</sup> for Golden Gate assembly                                        |
| SG1383 | MerRZntR <sup>A29E</sup> + Bsal rev                             | TTTAAAG <b>GTCTCAGGGG</b> TCAACAACCACT<br>CTTAACGCCACT                                            | Amplification of MerRZntR <sup>A29E</sup> for Golden Gate assembly                                        |
| SG1384 | P <sub>merR</sub> with 5'-Terminator + Bsal fwd                 | TTTAAAG <b>GTCTCACCCCAAAA</b> ACGCGAGC<br><u>GCCTGACGCTCGCGTTTTTTA</u> ACGGAAGA<br>ATGTGGCTTCTTGG | Amplification of P <sub>merR</sub> to include 5'-Terminator                                               |
| SG1385 | P <sub>merR</sub> with 5'-Terminator + Bsal rev                 | TTTAAAG <b>GTCTCTATTCTGATTTT</b> CATCCCC<br>ATATTGTCACC                                           | Amplification of P <sub>merR</sub> to include 5'-Terminator                                               |
| SG1387 | P <sub>cadA</sub> + Bsal Rev                                    | TTTAAAG <b>GTCTCATACTGCGCTT</b> GCTGTTT<br>TTCATTGACACT                                           | Amplification of P <sub>cadA</sub>                                                                        |
| SG1403 | P <sub>cadA</sub> + Bsal Fwd                                    | TTTAAAG <b>GTCTCATACTATTCAGCT</b> CCGTT<br>TCCGTTGTCT                                             | Amplification of P <sub>cadA</sub>                                                                        |
| SG1388 | P <sub>lial</sub> + Bsal fwd                                    | TTTAAAG <b>GTCTCATACTATTGGCCAAAGCA</b><br>GAAAGGTC                                                | Amplification of P <sub>lial</sub>                                                                        |
| SG1389 | P <sub>lial</sub> + Bsal rev                                    | TTTAAAG <b>GTCTCATACTATTGGCCAAAGCA</b><br>GAAAGGTC                                                | Amplification of P <sub>lial</sub>                                                                        |
| SG1410 | P <sub>xyIA</sub> + Bsal rev                                    | TTTAAAG <b>GTCTCCAAAATTCGATAAGCTTG</b><br>GGATCCCAG                                               | Amplification of P <sub>xyIA</sub>                                                                        |

<sup>a</sup> Restriction sites are in uppercase bold; QuickChange point mutation sites are underlined bold, RBS sequences in primers are in lowercase and underlined with a thin line; terminator sequence are underlined with a dotted line.

Supplementary Table S4. Relevant DNA sequences for plasmid construction

| Part                      | Part type & Function                                                                                                                       | Sequence <sup>a</sup>                                                                                                                                                                                                                                                                                                                                                                                                                                                                              |
|---------------------------|--------------------------------------------------------------------------------------------------------------------------------------------|----------------------------------------------------------------------------------------------------------------------------------------------------------------------------------------------------------------------------------------------------------------------------------------------------------------------------------------------------------------------------------------------------------------------------------------------------------------------------------------------------|
| <i>P<sub>merR20</sub></i> | MerR Family promoter recognised by MerR and the chimeras derived from this study. Contains a 20-bp spacer between the -10 and -35 elements | AACGGAAGAATGTGGCTTCTTGGCGTGAAGAGCAGA<br>TATCTTTATTCTTAAACTTCTAAAAAAGCTTATGTGAA<br>CACTTGATAAATAAGGTTTTTATCTGACCTATTTTAT<br>AAGATTATTCTATAAAAAGAAAAATAATGTATGACTT<br><b>GACCGTGTACTATGGTACAGGGTTATACTTTTTATT</b><br>GAGGTGACAATATGGGGATGAAAATCAGTGAATTGG<br>CTAAAGCGTGTGATGTGAATAAAGA                                                                                                                                                                                                               |
| <i>P<sub>merR19</sub></i> | MerR Family promoter recognised by MerR and the chimeras derived from this study. Contains a 19-bp spacer between the -10 and -35 elements | AACGGAAGAATGTGGCTTCTTGGCGTGAAGAGCAGA<br>TATCTTTATTCTTAAACTTCTAAAAAAGCTTATGTGAA<br>CACTTGATAAATAAGGTTTTTATCTGACCTATTTTAT<br>AAGATTATTCTATAAAAAGAAAAATAATGTATGACTT<br><b>GACCGTGTACTATGGTACAGGGTTATACTTTTTATTG</b><br>AGGTGACAATATGGGGATGAAAATCAGTGAATTGGC<br>TAAAGCGTGTGATGTGAATAAAGA                                                                                                                                                                                                               |
| <i>P<sub>veg</sub></i>    | Strong constitutive promoter native to <i>B. subtilis</i>                                                                                  | GGAGTTCTGAGAATTGGTATGCCTTATAAGTCCAATT<br>AACAGTTGAAAACCTGCATAGGAGAGCTATGCGGGT<br>TTTTTATTTACATAATGATACATAATTTACCGAACTT<br>GCGGAACATAATTGAGGAATCATAGAATTTTGTCAA<br>ATAATTTTATTGACAACGTCTTATTAACGTTGATATA<br>TTTAAATTTTATTTGACAAAAAATGGGCTCGTGTGTA<br><b>CAATAAATGTAGT</b>                                                                                                                                                                                                                           |
| MerR                      | Coding sequence for MerR including the native RBS and spacer region of MerR. Hg <sup>2+</sup> -sensor                                      | gaggtgacaatATGGGGATGAAAATCAGTGAATTGGCT<br>AAAGCGTGTGATGTGAATAAAGAAACCGTTCCGGTAT<br>TACGAGCGGAAAGGATTGATAGCCGGGCTCCCAGA<br>AACGAATCAGGGTATCGAATATATTCAGAGGAAACA<br>GCAGATCGGGTACGGTTTATTAACGAATGAAGGAA<br>TTGGATTTCTCGCTAAAGGAAATCCACCTGTTGTTG<br>GTGTGGTTGATCAAGATGGGGAGAGATGTAAAGATA<br>TGACGCCTTTACCGTTCAAAAAACCAAAGAAATCGA<br>GCGGAAAGTGCAGGGTTTGTACGAATCCAACGGTT<br>ATTAGAGGAATTAAGAAAGAAAGTGTCCAGATGAAAA<br>GGCGATGTATACCTGTCCTATTATTGAAACGTTAATG<br>GGAGGGCCTGATAAATAA                       |
| MerRZntR                  | Coding sequence for MerRZntR chimera including the native RBS and spacer region of MerR                                                    | gaggtgacaatATGGGGATGAAAATCAGTGAATTGGCT<br>AAAGCGTGTGATGTGAATAAAGAAACCGTTCCGGTAT<br>TACGAGCGGAAAGGATTGATAGCCGGGCTCCCAGA<br>AACGAATCAGGGTATCGACTATATACCGAAAGCGAT<br>CTCCAGCGATTGAAATTTATCCGCCATGCCAGACAAC<br>TAGGTTTCAGTCTGGAGTCGATCCGCGAGTTGCTGTC<br>GATCCGCATCGATCCTGAACACCATACTGTCAGGAG<br>TCAAAAGGCATTGTGCAGGAAAGATTGCAGGAAGTC<br>GAAGCACGGATAGCCGAGTTGCAGAGTATGCAGCGT<br>TCCTTGCAACGCCTTAACGATGCCTGTTGTGGGACTG<br>CTCATAGCAGTGTATTGTTTCGATTCTTGAAGCTCTT<br>GAACAAGGGGCGAGTGGCGTTAAGAGTGGTTGTTGA |

|                                    |                                                                                                                                                                                                   |                                                                                                                                                                                                                                                                                                                                                                                                                                                                                                      |
|------------------------------------|---------------------------------------------------------------------------------------------------------------------------------------------------------------------------------------------------|------------------------------------------------------------------------------------------------------------------------------------------------------------------------------------------------------------------------------------------------------------------------------------------------------------------------------------------------------------------------------------------------------------------------------------------------------------------------------------------------------|
| MerRZntR <sup>A29E</sup>           | Coding sequence for MerRZntR chimera including the native RBS and spacer region of MerR. Contains a A29E substitution in the $\alpha$ -helix 2-3 loop region. Optimised Zn <sup>2+</sup> - sensor | gaggtgacaatATGGGGATGAAAATCAGTGAATTGGCT<br>AAAGCGTGTGATGTGAATAAAGAAACCGTTCCGGTAT<br>TACGAGCGGAAAGGATTGATAGAAGGGCCTCCAGAA<br>AACGAATCAGGGTATCGACTATATACCGAAAGCGAT<br>CTCCAGCGATTGAAATTTATCCGCCATGCCAGACAAC<br>TAGGTTTCAGTCTGGAGTCGATCCGCGAGTTGCTGTC<br>GATCCGCATCGATCCTGAACACCATACTGTCAGGAG<br>TCAAAGGCATTGTGCAGGAAAGATTGCAGGAAGTC<br>GAAGCACGGATAGCCGAGTTGCAGAGTATGCAGCGT<br>TCCTTGCAACGCCTTAACGATGCCTGTTGTGGGACTG<br>CTCATAGCAGTGTATTATTGTTTCGATTCTTGAAGCTCTT<br>GAACAAGGGGCGAGTGGCGTTAAGAGTGTTGTTGA |
| MerRZntR <sup>A29E/G30H</sup>      | Coding sequence for MerRZntR chimera including the native RBS and spacer region of MerR. Contains a A29E/G30H substitution in the $\alpha$ -helix 2-3 loop region                                 | gaggtgacaatATGGGGATGAAAATCAGTGAATTGGCT<br>AAAGCGTGTGATGTGAATAAAGAAACCGTTCCGGTAT<br>TACGAGCGGAAAGGATTGATAGAACATCCTCCAGAA<br>AACGAATCAGGGTATCGACTATATACCGAAAGCGAT<br>CTCCAGCGATTGAAATTTATCCGCCATGCCAGACAAC<br>TAGGTTTCAGTCTGGAGTCGATCCGCGAGTTGCTGTC<br>GATCCGCATCGATCCTGAACACCATACTGTCAGGAG<br>TCAAAGGCATTGTGCAGGAAAGATTGCAGGAAGTC<br>GAAGCACGGATAGCCGAGTTGCAGAGTATGCAGCGT<br>TCCTTGCAACGCCTTAACGATGCCTGTTGTGGGACTG<br>CTCATAGCAGTGTATTATTGTTTCGATTCTTGAAGCTCTT<br>GAACAAGGGGCGAGTGGCGTTAAGAGTGTTGTTGA |
| MerRZntR <sup>A29E/G30H/P32V</sup> | Coding sequence for MerRZntR chimera including the native RBS and spacer region of MerR. Contains a A29E/G30H/P32V substitution in the $\alpha$ -helix 2-3 loop region                            | gaggtgacaatATGGGGATGAAAATCAGTGAATTGGCT<br>AAAGCGTGTGATGTGAATAAAGAAACCGTTCCGGTAT<br>TACGAGCGGAAAGGATTGATAGAACATCCTGTTAGA<br>AACGAATCAGGGTATCGACTATATACCGAAAGCGAT<br>CTCCAGCGATTGAAATTTATCCGCCATGCCAGACAAC<br>TAGGTTTCAGTCTGGAGTCGATCCGCGAGTTGCTGTC<br>GATCCGCATCGATCCTGAACACCATACTGTCAGGAG<br>TCAAAGGCATTGTGCAGGAAAGATTGCAGGAAGTC<br>GAAGCACGGATAGCCGAGTTGCAGAGTATGCAGCGT<br>TCCTTGCAACGCCTTAACGATGCCTGTTGTGGGACTG<br>CTCATAGCAGTGTATTATTGTTTCGATTCTTGAAGCTCTT<br>GAACAAGGGGCGAGTGGCGTTAAGAGTGTTGTTGA |
| MerRCueR                           | Coding sequence for MerRCueR chimera including the native RBS and spacer region of MerR                                                                                                           | gaggtgacaatATGGGGATGAAAATCAGTGAATTGGCT<br>AAAGCGTGTGATGTGAATAAAGAAACCGTTCCGGTAT<br>TACGAGCGGAAAGGATTGATAGCCGGGCCTCCAGAA<br>AACGAATCAGGGTATCGCACCTACACGCAGCAGCAT<br>CTCAACGAACTGACCTTACTGCGCCAGGCACGGCAG<br>GTGGGCTTTAACCTGGAAGAGAGCGGCGAGCTGGTG<br>AATCTGTTTAAACGACCCGACGCGGCACAGCGCCGAC<br>GTCAAACGGCGCACGCTGGAGAAGGTGGCGGAGAT<br>CGAACGACACATTGAGGAGCTGCAATCCATGCGCGA<br>CCAGTGCTGGCACTGGCGAATGCCTGCCCTGGCGA<br>TGACAGCGCCGACTGCCCGATTATCGAAAATCTCTCC<br>GGCTGCTGTCATCATCGGGCAGGGTGA               |

|                                    |                                                                                                                                                                        |                                                                                                                                                                                                                                                                                                                                                                                                                                                                                         |
|------------------------------------|------------------------------------------------------------------------------------------------------------------------------------------------------------------------|-----------------------------------------------------------------------------------------------------------------------------------------------------------------------------------------------------------------------------------------------------------------------------------------------------------------------------------------------------------------------------------------------------------------------------------------------------------------------------------------|
| MerRCueR <sup>A29T</sup>           | Coding sequence for MerRCueR chimera including the native RBS and spacer region of MerR. Contains a A29T substitution in the $\alpha$ -helix 2-3 loop region           | gaggtgacaatATGGGGATGAAAATCAGTGAATTGGCT<br>AAAGCGTGTGATGTGAATAAAGAAACCGTTTCGGTAT<br>TACGAGCGGAAAGGATTGATAACAGGGCCTCCCAGA<br>AACGAATCAGGGTATCGCACCTACACGCAGCAGCAT<br>CTCAACGAACTGACCTTACTGCGCCAGGCACGGCAG<br>GTGGGCTTTAACCTGGAAGAGAGCGGCGAGCTGGTG<br>AATCTGTTTAAACGACCCGCAGCGGCACAGCGCCGAC<br>GTCAAACGGCGCACGCTGGAGAAGGTGGCGGAGAT<br>CGAACGACACATTGAGGAGCTGCAATCCATGCGCGA<br>CCAGTGCTGGCACTGGCGAATGCCTGCCCTGGCGA<br>TGACAGCGCCGACTGCCCCGATTATCGAAAATCTCTCC<br>GGCTGCTGTCATCATCGGGCAGGGTGA |
| MerRCueR <sup>A29T/G30P</sup>      | Coding sequence for MerRCueR chimera including the native RBS and spacer region of MerR. Contains a A29T/G30P substitution in the $\alpha$ -helix 2-3 loop region      | gaggtgacaatATGGGGATGAAAATCAGTGAATTGGCT<br>AAAGCGTGTGATGTGAATAAAGAAACCGTTTCGGTAT<br>TACGAGCGGAAAGGATTGATAACACCGCCTCCCAGA<br>AACGAATCAGGGTATCGCACCTACACGCAGCAGCAT<br>CTCAACGAACTGACCTTACTGCGCCAGGCACGGCAG<br>GTGGGCTTTAACCTGGAAGAGAGCGGCGAGCTGGTG<br>AATCTGTTTAAACGACCCGCAGCGGCACAGCGCCGAC<br>GTCAAACGGCGCACGCTGGAGAAGGTGGCGGAGAT<br>CGAACGACACATTGAGGAGCTGCAATCCATGCGCGA<br>CCAGTGCTGGCACTGGCGAATGCCTGCCCTGGCGA<br>TGACAGCGCCGACTGCCCCGATTATCGAAAATCTCTCC<br>GGCTGCTGTCATCATCGGGCAGGGTGA |
| MerRCueR <sup>A29T/G30P/P32M</sup> | Coding sequence for MerRCueR chimera including the native RBS and spacer region of MerR. Contains a A29T/G30P/P32M substitution in the $\alpha$ -helix 2-3 loop region | gaggtgacaatATGGGGATGAAAATCAGTGAATTGGCT<br>AAAGCGTGTGATGTGAATAAAGAAACCGTTTCGGTAT<br>TACGAGCGGAAAGGATTGATAACACCGCCTATGAGA<br>AACGAATCAGGGTATCGCACCTACACGCAGCAGCAT<br>CTCAACGAACTGACCTTACTGCGCCAGGCACGGCAG<br>GTGGGCTTTAACCTGGAAGAGAGCGGCGAGCTGGTG<br>AATCTGTTTAAACGACCCGCAGCGGCACAGCGCCGAC<br>GTCAAACGGCGCACGCTGGAGAAGGTGGCGGAGAT<br>CGAACGACACATTGAGGAGCTGCAATCCATGCGCGA<br>CCAGTGCTGGCACTGGCGAATGCCTGCCCTGGCGA<br>TGACAGCGCCGACTGCCCCGATTATCGAAAATCTCTCC<br>GGCTGCTGTCATCATCGGGCAGGGTGA |
| RsoA                               | Coding sequence for RsoA, co- $\sigma$ -factor of SigO                                                                                                                 | GTGGACGGCCAGTTTGAACAAAAAAGAAACAAAAA<br>GACGAGACTTATGACATTGAGCACCTGATTGCATGCT<br>TTTCACCGATGATCAGA<br>AAAAAACTCAGCAATACGTCCTATCAAGAAAGAGAA<br>GATTTAGAGCAAGAGCTGAAGATCAAATGTTTGAA<br>AAGGCTGATATGCTTTTATGTCAGGATGTACCGGGGT<br>TTTGGGAGTTTATTTGTACATGGTAGATGAGAACTC<br>ATAA                                                                                                                                                                                                               |
| SigO                               | Coding sequence for SigO, co- $\sigma$ -factor of RsoA                                                                                                                 | ATGAAGCATCCCATCGTGAAGCATTTTTTGAGCAATC<br>CTCAGCATTACCGTTTGTCAAACGTAATGGAAAG<br>CCCTAACGAAAAAGATGCAAGATCATTGGACGAGCT<br>ATTTAAGCAATTTTATAAAGAAATCCGCATCGTCAAG                                                                                                                                                                                                                                                                                                                            |

|                       |                                                                                                                           |                                                                                                                                                                                                                                                                                                                                                                                                                                          |
|-----------------------|---------------------------------------------------------------------------------------------------------------------------|------------------------------------------------------------------------------------------------------------------------------------------------------------------------------------------------------------------------------------------------------------------------------------------------------------------------------------------------------------------------------------------------------------------------------------------|
|                       |                                                                                                                           | TATATGAATTCAATGATTTCGCATCTTTTCTATTGATTT<br>GATAAGCGGGTTCGCAAAAACCAAAAACGGTATCCA<br>CTGACGGTTGATCATCCGGAGGCGGGAGATCGGCTT<br>TCTTCCGAAACAGGTAGCGATGCATTTGAAGAATTTT<br>TAGACAGGCAGGATGATTTGAGCCAGCATGTACAGG<br>ATTACCAGCTCTACCAAGCGATCCAGAAGCTGACTGA<br>CAAACAAAAAAGTGTGCTGACGAAAGTCTATCTTCAC<br>GGTGCCACGATGCAGGAGATTGCAGATTCATTAGGG<br>GAGTCCCGACAAAACATCTCCAACATTCATAAAAAGG<br>GGCTGGAGAATATCAGAAAGCAGTTAGCGGCGCAAA<br>AAAAGGGGGAAAAGTAA |
| P <sub>oxdC</sub>     | P <sub>oxdC</sub> promoter recognised by SigO and RsoA                                                                    | GATTGAAAAGAAGTTTGATCAACTAATAGAACTAAT<br>GACAGAACTGAAAGATCATGCAAAAAATAATTTTTC<br>AATCGAAG <b>TGACT</b> TTTTCACTGGTTTTTT <b>CACTTAAC</b><br>AAAACAGAAGGGAAAACGAA                                                                                                                                                                                                                                                                           |
| P <sub>xylA</sub>     | Xylose-inducible promoter lacking CRE-element. Sequence is derived from Radeck <i>et al</i> <sup>3</sup>                  | AAGGCCAAAAAAGTCTGCCTTCGGATCAGCGATATC<br>CACTTCATCCACTCCATTTGTTTAATCTTTAAATTAAGT<br>ATCAACATAGTACATAGCGAATCTTCCCTTTATTATAT<br>CTAATGTGTTTCATAAAAAAAGTAAAAAAT <b>TATTGAAA</b><br>ATACTGACGAGGTT <b>TATAAGAT</b> GAAAAATAAGTTAG<br><u>TTTGTTTAAACAACAAACTAATAGGTGATGTACTTACT</u><br>ATATGAAATAAATGCATCTGGGATCCCAAGCTTATC<br>GAA                                                                                                             |
| P <sub>lial</sub>     | Bacitracin-inducible promoter. Sequence is derived from Radeck <i>et al</i> <sup>3</sup>                                  | ATTGGCCAAAGCAGAAAGGTCCGACCTAATTAAGA<br>AAGGGAAGCAAGTGTTTCATCTGTAAAGGGTTTTAAA<br>ACGCCATGCCTCGTGCATGGCGTTTTTTGTGCCAAT<br>GGGTCCGGTGCAGAT <b>ACGACTCCGGTCTTATATAAA</b><br>AATCAATCTCTGAT <b>TCG</b> TTTTGCATATCTTCCA <b>ACTTG</b><br><b>TATAAGATGAAGACAAGGAAAACGA</b>                                                                                                                                                                      |
| Terminator 1 “Term 1” | Strong minimal terminator to prevent transcriptional read-through. Sequence is derived from Cui <i>et al</i> <sup>5</sup> | AAAAACGCGAGCGCCTGACGCTCGCGTTTTTTT                                                                                                                                                                                                                                                                                                                                                                                                        |
| RBS R1                | RBS used for SigO and RsoA translation. Sequence is derived from Guiziu <i>et al</i> <sup>6</sup>                         | GCTCTTAAAGGGGGTTTTAGA                                                                                                                                                                                                                                                                                                                                                                                                                    |
| P <sub>cadA</sub>     | Metal inducible promoter regulated natively by CzrA                                                                       | ATTCAGCTCCGTTTCCGTTGTTCTGAATGCTCTT<br>CGTCTGCAAAAAGTAAAATGAAAAACCGGCTATA<br>TGCCGGTTTTTGTTTTTTCA <b>TTGACA</b> CTTTCTTGG<br>AAAACAACA <b>TATAAT</b> AGGTGTA <b>ACTTATATATGA</b><br><u>GTATATGCTCATATATATAAAATAAATACAATAC</u><br>TCATTGATACGCTTTGAAGAGGGAA                                                                                                                                                                                |

<sup>a</sup> For sequences of this study, the -10 and -35 elements are in bold; positions where a regulator binds are underlined; RBS and spacer are in lowercase.

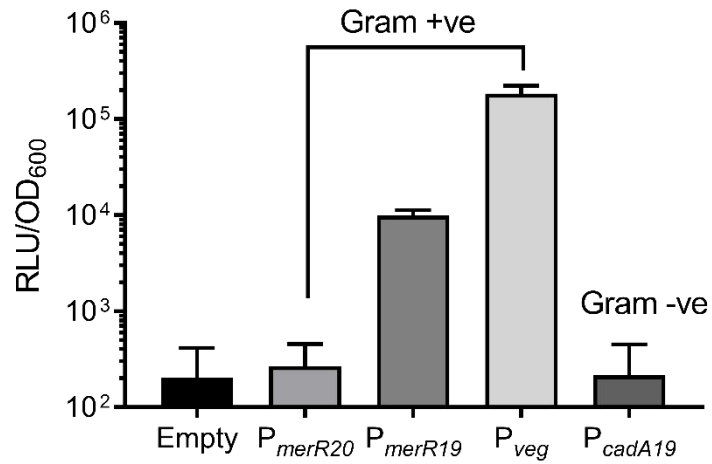

**Supplementary Figure S1. Comparison of Gram +ve and Gram -ve MerR promoter activity in *B. subtilis*.** Cells harbouring either an empty luciferase reporter, P<sub>merR20</sub> (Gram +ve), P<sub>merR19</sub> (Gram +ve), P<sub>veg</sub> (Gram +ve) or P<sub>cadA19</sub> (Gram -ve) were grown in MM9 media with luciferase activity measured overtime. Values presented are the average of three time points (35-, 40- and 45-minutes) following initial inoculation into MM9 medium. The strong Gram +ve *B. subtilis* promoter P<sub>veg</sub> was included as a control. Subscripts indicate the size of the spacer region between the -10 and -35 elements for MerR family promoters. Data are the ± standard deviation of triplicate measurements performed on three different days.





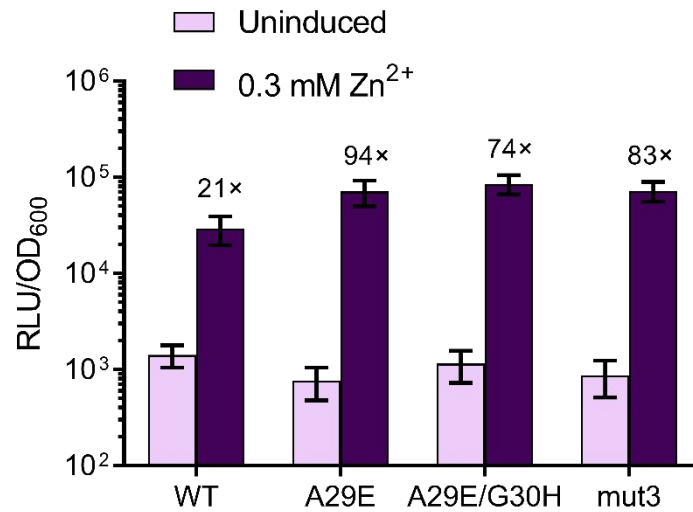

**Supplementary Figure S3. Activity of double and triple MerRZntR mutants against the wild-type and single mutant MerRZntR<sup>A29E</sup>.** Residues in between alpha-helix 2-3 were mutated to those found natively in ZntR, generating MerRZntR<sup>A29E/G30H</sup> and MerRZntR<sup>A29E/G30H/P32V</sup> (mut3), with the activity compared relative to both wild-type (MerRZntR) and the single mutant (MerRZntR<sup>A29E</sup>). Cells were grown to OD<sub>600</sub> = ~ 0.03 and induced at the highest sub-lethal tested concentration of Zn<sup>2+</sup> with luciferase activity (relative luminescence units (RLU) normalised by cell density (OD<sub>600</sub>)) for three time points (35-, 40- and 45-mins) post induction. Fold-induction values of the induced (dark purple) are relative to the respective uninduced strain (light purple). Values are presented as mean and ± standard deviation of either two or three independent replicates.

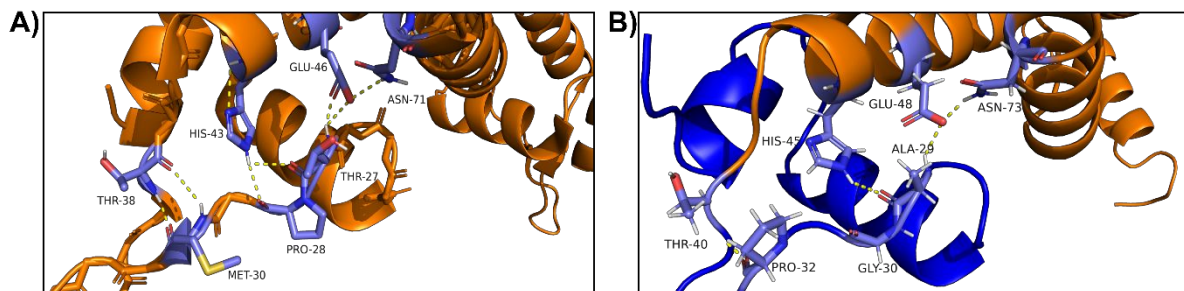

**C)**

|         |                                                                                |    |
|---------|--------------------------------------------------------------------------------|----|
| CueR_Ec | MNISDVAKITGLTSKAIRFYEEKGLV <b>TPPM</b> RSENGYR <b>TYTQQHLNEL</b> TLLRQARQVGFNL | 60 |
| CueR_Kp | MNISDVAKITGLTSKAIRFYEEKGLV <b>TPPM</b> RSENGYR <b>TYTQQHLNEL</b> TLLRQARQVGFNL | 60 |
| CueR_Sf | MNISDVAKITGLTSKAIRFYEEKGLV <b>TPPM</b> RSENGYR <b>TYTQQHLNEL</b> TLLRQARQVGFNL | 60 |
| CueR_Pa | MNISDVAKKTGLTSKAIRFYEEKGLV <b>TPPL</b> RSENGYR <b>TYSQQHLD</b> ELTLLRQARQVGFNL | 60 |
| CueR_Se | MNISDVAKKTGLTSKAIRFYEEKGLV <b>TPPL</b> RSENGYR <b>TYTQKHLNEL</b> TLLRQARQVGFNL | 60 |

\*\*\*\*\* :\*\*\*\*\*:\*.\*\*:\*\*\*\*\*

**Supplementary Figure S4. Comparison of inter-domain communication between CueR and the chimera MerRCueR.**

**A)** Magnification of the CueR (*E. coli*, accession code: CAD6020341.1) inter-domain hydrogen bonding network between  $\alpha$ -helices 2-3. **B)** Magnification of the MerRCueR chimera inter-domain hydrogen bonding network between  $\alpha$ -helices 2-3. Here, the MerR (*S. aureus*) derived DNA-Binding Domain is indicated in dark blue, whilst the CueR (*E. coli*) derived Metal-Binding Domain is indicated in orange. For panels **A** and **B**, residues of interest are coloured in lavender blue and are numbered accordingly, with hydrogen bonds indicated in yellow. **C)** Sequence alignment of CueR from various Gram-negative genetic backgrounds (“Ec” – *E. coli*, accession code: CAD6020341.1; “Kp” – *K. pneumoniae*, accession code: OZQ58601.1; “Sf” – *S. flexneri*, accession code: EFX2973845.1; “Pa” – *P. aeruginosa*, accession code: MXH36715.1; “Se” – *S. enterica*, accession code: EAS1883030.1). Residues of interest involved in interdomain communication are highlighted in bold orange. Asterisk “\*” indicates fully conserved residues, colon “:” indicates conserved residues with similar properties, and period “.” indicates residues of weakly similar properties.

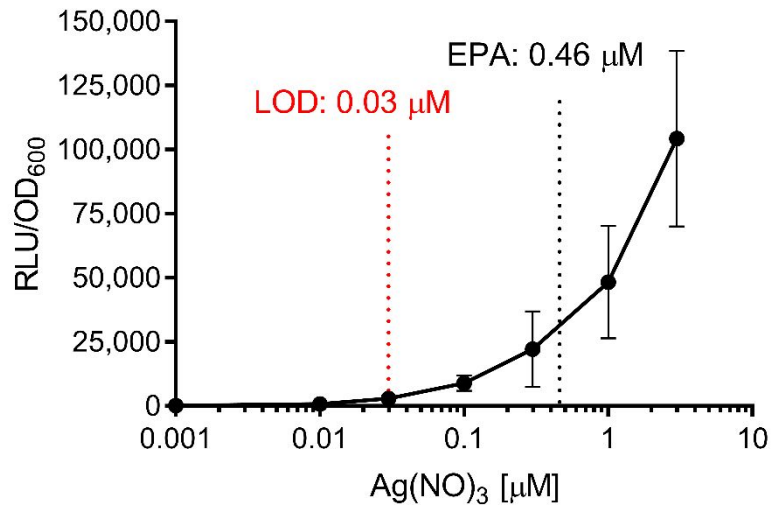

**Supplementary Figure S5. Dose response of  $P_{merR}$  regulated by MerRCueR<sup>mut3</sup> in response to Ag<sup>+</sup> induction.**

Transcriptional output from  $P_{merR}$  is shown in response to various concentrations of Ag<sup>+</sup>. Cells were induced at OD<sub>600</sub> = ~ 0.03 with luciferase activity (relative luminescence units [RLU]) normalised to optical density (OD<sub>600</sub>) values (RLU/OD<sub>600</sub>) from three time points (35-, 40- and 45-mins post induction). Values for the limit of detection (LOD) and Environmental Protection Agency (EPA) guideline values are indicated. Values are presented as mean and ± standard deviation of either two or three independent replicates.



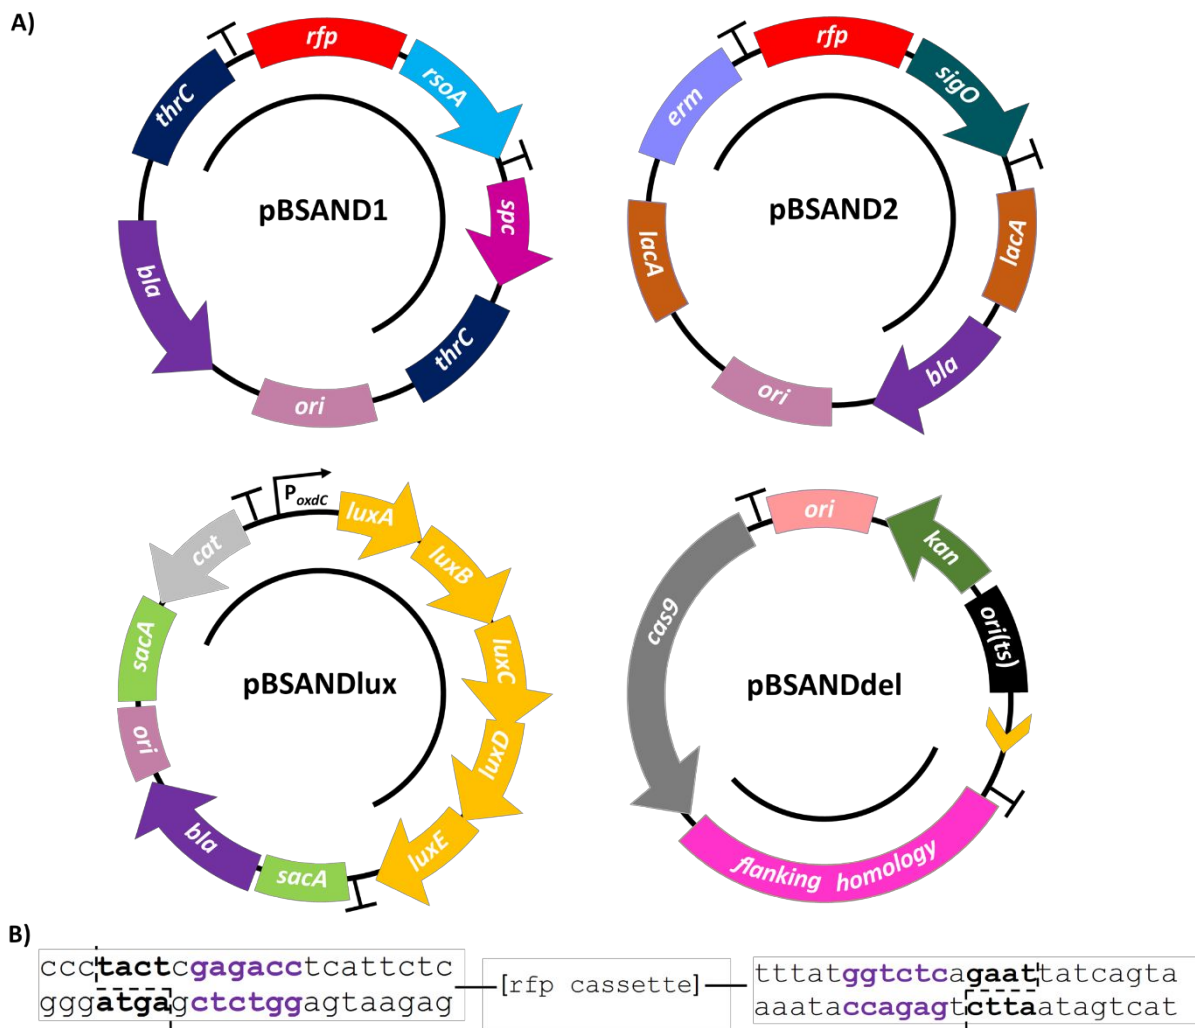

**Supplementary Figure S7. Maps of the *B. subtilis* SANDBOX plasmids.** A) Vector architecture for plasmids pBSAND1 and pBSAND2 both of which contain one half of the two-subunit sigma factor system SigO-RsoA. Plasmids pBSAND1, pBSAND2 and pBSANDlux are all integrative vectors with resistance markers *spc* (spectinomycin), *erm* (MLS; macrolide, lincosamide and streptogramin B antibiotics if induced by erythromycin) and *cat* (chloramphenicol) and integrate at the loci *thrC*, *lacA* and *sacA*, respectively. Whilst pBSANDdel is an integrative vector, the flanking homology region (shown in pink) is the only integrative portion of the plasmid. The gRNA to cut within the *sigO-rsoA* regulon is indicated with an orange arrowhead. Plasmid pBSANDlux is a luciferase-based reporter vector ( $P_{oxdC}$ -*luxABCDE*) and pBSANDdel is a modified CRISPR-Cas9 vector designed to knockout the SigO-RsoA regulon. The integrative portion of all the logic gate plasmids are shown with a black line, terminators are indicated with the "T" symbol, and all comprise a *bla* (ampicillin) resistance marker to allow for selection in *E. coli* – the exception of which is pBSANDdel which has a *kan* (kanamycin) marker for selection in both *E. coli* and *B. subtilis*. Plasmids pBSAND1, pBSAND2, pBSANDlux and pBSANDdel are derived from pBS4S, pBS2E, pBS3Clux and pJOE8999<sup>3,4</sup>. B) The Golden Gate cloning site based on BsaI. The RFP cassette is flanked by two Golden Gate restriction sites, highlighted in bold purple, with the overhang indicated in bold black.

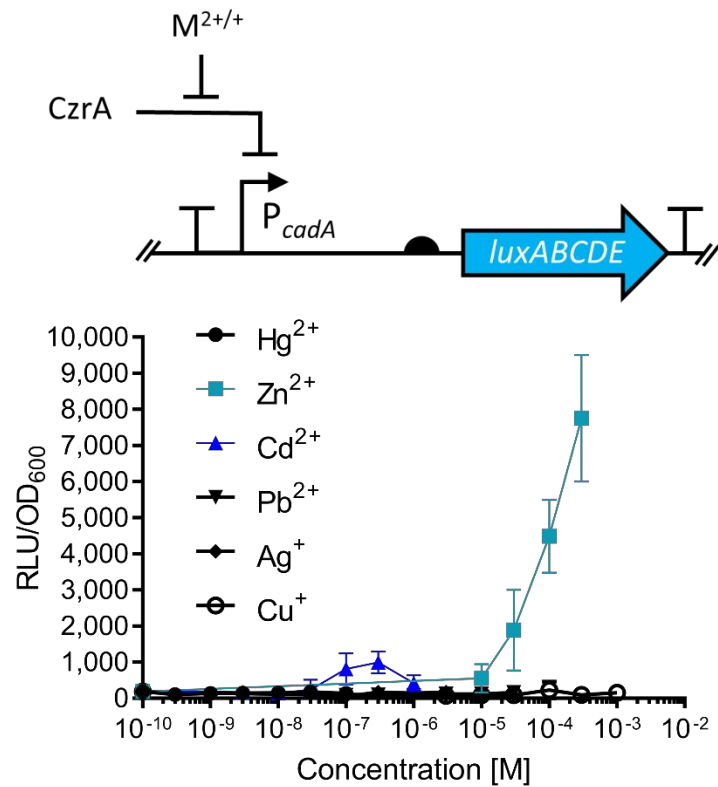

**Supplementary Figure S8. *Bacillus subtilis* metal-sensory circuit controlled by the native CzrA regulator.** In the circuit shown, CzrA mediated repression of the cognate promoter  $P_{cadA}$  is relieved upon the addition of heavy metal ions. Transcriptional output from  $P_{cadA}$ , measured via luciferase activity ( $luxABCDE$ , light blue arrow) is shown in response to various concentrations of heavy metals. Inducers,  $Zn^{2+}$  and  $Cd^{2+}$  are indicated in teal and dark blue respectively.  $M^{+/2+}$  indicates the addition of either a monovalent or divalent metal ion. Cells were induced at  $OD_{600} = \sim 0.03$  with luciferase activity (relative luminescence units [RLU]) normalised to optical density ( $OD_{600}$ ) values ( $RLU/OD_{600}$ ) from three time points (35-, 40- and 45-mins post induction). Values are presented as mean and  $\pm$  standard deviation of either two or three independent replicates.

## References

1. Derre, I., Rapoport, G. & Msadek, T. The CtsR regulator of stress response is active as a dimer and specifically degraded in vivo at 37°C. *Mol. Microbiol.* **38**, 335–347 (2000).
2. Schmalisch, M. *et al.* Small genes under sporulation control in the *Bacillus subtilis* genome. *J. Bacteriol.* **192**, 5402–5412 (2010).
3. Radeck, J. *et al.* The *Bacillus* BioBrick Box: Generation and evaluation of essential genetic building blocks for standardized work with *Bacillus subtilis*. *J. Biol. Eng.* **7**, (2013).
4. Altenbuchner, J. Editing of the *Bacillus subtilis* genome by the CRISPR-Cas9 system. *Appl. Environ. Microbiol.* **82**, 5421–5427 (2016).
5. Cui, W. *et al.* Data-Driven and in Silico-Assisted Design of Broad Host-Range Minimal Intrinsic Terminators Adapted for Bacteria. *ACS Synth. Biol.* **10**, 1438–1450 (2021).
6. Guiziou, S. *et al.* A part toolbox to tune genetic expression in *Bacillus subtilis*. *Nucleic Acids Res.* **44**, 7495–7508 (2016).
7. Parkhill, J. & Brown, N. L. Site-specific insertion and deletion mutants in the *mer* promoter-operator region of Tn501; the nineteen base-pair spacer is essential for normal induction of the promoter by MerR. **18**, 5157–5162 (1990).
